# Supplementary material
Source: PubMed Central journal article supplement (PMC37445)
Supplement: pnas_98_15_8368__1.pdf [file pnas_98_15_8368__1.pdf]

**Table 4.** Stopped-flow data of S158C/W199F during holoenzyme assembly

| State | $F_{AD}^{290}$   | $F_A^{290}$      | $F_A^{390}$      | $I_{AD} + X$     | $I_A + X$        | $I_A$            | $X$              | $I_{AD}$         | $I_{AD} / I_A$   | $E_T$            |
|-------|------------------|------------------|------------------|------------------|------------------|------------------|------------------|------------------|------------------|------------------|
| A     | 1.000            | 1.000            | 1.000            | 1.502            | 1.000            | 1.000            | 0.000            | 0.502            | 1.502            | 0.409            |
| B     | 1.000            | 1.000            | 1.000            | 1.502            | 1.000            | 1.000            | 0.000            | 0.502            | 1.502            | 0.409            |
| C     | 1.210 ±<br>0.001 | 1.281 ±<br>0.001 | 1.239 ±<br>0.001 | 1.817 ±<br>0.002 | 1.281 ±<br>0.002 | 1.239 ±<br>0.002 | 0.042 ±<br>0.002 | 1.775 ±<br>0.003 | 1.433 ±<br>0.004 | 0.353<br>±0.001  |
| D     | 1.333 ±<br>0.001 | 1.428 ±<br>0.001 | 1.417 ±<br>0.001 | 2.423 ±<br>0.003 | 1.829 ±<br>0.003 | 1.632 ±<br>0.005 | 0.198 ±<br>0.004 | 2.225 ±<br>0.005 | 1.364 ±<br>0.005 | 0.296<br>±0.001  |
| E     | 1.333 ±<br>0.001 | 1.428 ±<br>0.001 | 1.417 ±<br>0.001 | 2.423 ±<br>0.003 | 1.829 ±<br>0.003 | 1.632 ±<br>0.005 | 0.198 ±<br>0.004 | 2.225 ±<br>0.005 | 1.364 ±<br>0.005 | 0.296 ±<br>0.001 |
| F     | 1.095 ±<br>0.003 | 1.141 ±<br>0.003 | 1.064 ±<br>0.003 | 2.653 ±<br>0.008 | 2.087 ±<br>0.006 | 1.736 ±<br>0.010 | 0.351 ±<br>0.008 | 2.302 ±<br>0.011 | 1.326 ±<br>0.010 | 0.265 ±<br>0.002 |
| G     | 1.083 ±<br>0.003 | 1.134 ±<br>0.003 | 1.059 ±<br>0.003 | 2.873 ±<br>0.012 | 2.367 ±<br>0.009 | 1.839 ±<br>0.014 | 0.528 ±<br>0.011 | 2.345 ±<br>0.016 | 1.275 ±<br>0.013 | 0.224 ±<br>0.002 |
| H     | 1.070 ±<br>0.003 | 1.129 ±<br>0.003 | 1.050 ±<br>0.003 | 3.074 ±<br>0.015 | 2.672 ±<br>0.012 | 1.931 ±<br>0.019 | 0.742 ±<br>0.015 | 2.332 ±<br>0.021 | 1.208 ±<br>0.016 | 0.170 ±<br>0.002 |
| I     | 1.070 ±<br>0.003 | 1.129 ±<br>0.003 | 1.050 ±<br>0.003 | 3.074 ±<br>0.015 | 2.672 ±<br>0.012 | 1.931 ±<br>0.019 | 0.742 ±<br>0.015 | 2.332 ±<br>0.021 | 1.208 ±<br>0.016 | 0.170 ±<br>0.002 |
| J     | 1.122 ±<br>0.001 | 1.048 ±<br>0.001 | 1.019 ±<br>0.001 | 3.449 ±<br>0.017 | 2.800 ±<br>0.013 | 1.967 ±<br>0.021 | 0.833 ±<br>0.016 | 2.616 ±<br>0.023 | 1.330 ±<br>0.018 | 0.269 ±<br>0.003 |
| K     | 1.284 ±<br>0.001 | 1.182 ±<br>0.001 | 1.003 ±<br>0.001 | 4.424 ±<br>0.022 | 3.310 ±<br>0.016 | 1.973 ±<br>0.024 | 1.337 ±<br>0.018 | 3.092 ±<br>0.028 | 1.567 ±<br>0.024 | 0.462 ±<br>0.006 |

See ref. 1 for explanation of terms and calculations.

Reference:

1. Alley, S. C., Abel-Santos, E. & Benkovic, S. J. (2000) *Biochemistry* **39**, 3076-3090.
