# Supplementary material
Source: PubMed Central journal article supplement (PMC37445)
Supplement: pnas_98_15_8368__2.pdf [file pnas_98_15_8368__2.pdf]

**Table 5.** Stopped-flow data of T168C/W199F during holoenzyme assembly

| State | $F_{AD}^{290}$   | $F_A^{290}$      | $F_A^{390}$      | $I_{AD} + X$     | $I_A + X$        | $I_A$            | $X$              | $I_{AD}$         | $I_{AD}/I_A$     | $E_T$            |
|-------|------------------|------------------|------------------|------------------|------------------|------------------|------------------|------------------|------------------|------------------|
| A     | 1.000            | 1.000            | 1.000            | 1.508            | 1.000            | 1.000            | 0.000            | 0.508            | 1.508            | 0.414            |
| B     | 1.000            | 1.000            | 1.000            | 1.508            | 1.000            | 1.000            | 0.000            | 0.508            | 1.508            | 0.414            |
| C     | 1.080 ±<br>0.001 | 1.101 ±<br>0.001 | 1.043 ±<br>0.001 | 1.629 ±<br>0.002 | 1.101 ±<br>0.002 | 1.043 ±<br>0.002 | 0.058 ±<br>0.003 | 1.571 ±<br>0.004 | 1.506 ±<br>0.005 | 0.412 ±<br>0.001 |
| D     | 1.091 ±<br>0.001 | 1.142 ±<br>0.001 | 1.044 ±<br>0.001 | 1.777 ±<br>0.003 | 1.257 ±<br>0.003 | 1.089 ±<br>0.002 | 0.168 ±<br>0.004 | 1.608 ±<br>0.005 | 1.477 ±<br>0.005 | 0.389 ±<br>0.001 |
| E     | 1.091 ±<br>0.001 | 1.142 ±<br>0.001 | 1.044 ±<br>0.001 | 1.777 ±<br>0.003 | 1.257 ±<br>0.003 | 1.089 ±<br>0.002 | 0.168 ±<br>0.004 | 1.608 ±<br>0.005 | 1.477 ±<br>0.005 | 0.389 ±<br>0.001 |
| F     | 1.046 ±<br>0.003 | 1.053 ±<br>0.001 | 1.028 ±<br>0.001 | 1.859 ±<br>0.006 | 1.325 ±<br>0.003 | 1.119 ±<br>0.002 | 0.205 ±<br>0.004 | 1.654 ±<br>0.007 | 1.478 ±<br>0.007 | 0.389 ±<br>0.002 |
| G     | 1.038 ±<br>0.003 | 1.005 ±<br>0.001 | 1.011 ±<br>0.001 | 1.929 ±<br>0.008 | 1.331 ±<br>0.003 | 1.132 ±<br>0.002 | 0.199 ±<br>0.004 | 1.730 ±<br>0.009 | 1.529 ±<br>0.008 | 0.431 ±<br>0.002 |
| H     | 1.064 ±<br>0.003 | 1.009 ±<br>0.001 | 0.998 ±<br>0.001 | 2.053 ±<br>0.010 | 1.343 ±<br>0.003 | 1.129 ±<br>0.002 | 0.213 ±<br>0.004 | 1.840 ±<br>0.011 | 1.629 ±<br>0.010 | 0.512 ±<br>0.003 |
| I     | 1.064 ±<br>0.003 | 1.009 ±<br>0.001 | 0.998 ±<br>0.001 | 2.053 ±<br>0.010 | 1.343 ±<br>0.003 | 1.129 ±<br>0.002 | 0.213 ±<br>0.004 | 1.840 ±<br>0.011 | 1.629 ±<br>0.010 | 0.512 ±<br>0.003 |
| J     | 1.058 ±<br>0.001 | 1.045 ±<br>0.001 | 1.019 ±<br>0.001 | 2.145 ±<br>0.011 | 1.403 ±<br>0.003 | 1.151 ±<br>0.002 | 0.252 ±<br>0.004 | 1.893 ±<br>0.012 | 1.645 ±<br>0.011 | 0.525 ±<br>0.003 |
| K     | 1.079 ±<br>0.001 | 1.119 ±<br>0.001 | 1.020 ±<br>0.001 | 2.400 ±<br>0.013 | 1.570 ±<br>0.004 | 1.174 ±<br>0.002 | 0.396 ±<br>0.004 | 2.004 ±<br>0.014 | 1.707 ±<br>0.012 | 0.576 ±<br>0.003 |

See ref. 1 for explanation of terms and calculations.

Reference:

1. Alley, S. C., Abel-Santos, E. & Benkovic, S. J. (2000) *Biochemistry* **39**, 3076-3090.
